# Supplementary material for: Unravelling the transformation from a type-I to type-II MA 3 Bi 2 I 9 -based heterostructure photocatalyst via energy band engineering
Source: Royal Society of Chemistry journal article supplement (doi:10.1039/d5se01135c), 2025-11-10
Supplement: d5se01135c1.pdf [file d5se01135c1.pdf]

Electronic Supplementary Information

# Unravelling the Transformation from type-I to type-II MA<sub>3</sub>Bi<sub>2</sub>I<sub>9</sub> based heterostructure photocatalyst via energy band engineering

*Tamal Pal,<sup>a</sup> Soumalya Bhowmik,<sup>b</sup> Sushant Sharma,<sup>a</sup> Ameer Suhail M,<sup>b</sup> Nageswara Rao*

*Peela,<sup>b,c</sup> Chivukula V. Sastri, \*<sup>a</sup> Parameswar Krishnan Iyer\*<sup>a,b</sup>*

<sup>a</sup>Department of Chemistry, Indian Institute of Technology Guwahati, Guwahati 781039

Assam, India. E-mail: [pki@iitg.ac.in](mailto:pki@iitg.ac.in)

<sup>b</sup>Centre for Nanotechnology, Indian Institute of Technology Guwahati, Guwahati 781039

Assam, India.

<sup>c</sup>Department of Chemical Engineering, Indian Institute of Technology Guwahati, Guwahati

781039 Assam, India.

**Materials:**

Ammonium molybdate tetrahydrate, Sodium hypophosphite monohydrate, Bismuth iodide, HI (57 wt.% in H<sub>2</sub>O), thiourea, anhydrous DMSO, anhydrous toluene were purchased from Sigma-Aldrich. Methylammonium iodide was purchased from Great cell solar. All chemicals were used as received.

**Preparation of amorphous MoS<sub>2</sub> and P doped MoS<sub>2</sub>**

In a conventional synthesis procedure, 20 mL of ethylene diamine was solubilized in 10 mL of distilled water. Subsequently, 1 mmol of (NH<sub>4</sub>)<sub>6</sub>Mo<sub>7</sub>O<sub>24</sub>·4H<sub>2</sub>O was incorporated while stirring. Following complete dissolution, 4 mmol of thiourea was introduced and the mixture was agitated for a duration of 30 minutes. As a phosphorus precursor, varying amounts of NaH<sub>2</sub>PO<sub>2</sub>·H<sub>2</sub>O (specifically, 50 mg and 100 mg) were incorporated into the precursor solution. The resultant solution was then transferred into a 50 mL Teflon-lined stainless-steel autoclave and subjected to heating at 200 °C for a period of 12 hours, after which it was allowed to cool to ambient temperature spontaneously. The resultant black precipitate was isolated via centrifugation and subjected to multiple washings with deionized water and ethanol to eliminate any residual ions, followed by drying at 50 °C for 6 hours in preparation for subsequent characterization. Three distinct variants of MoS<sub>2</sub> were synthesized, denoted as MoS<sub>2</sub>, P50\_MoS<sub>2</sub>, and P100\_MoS<sub>2</sub>.

**Preparation of MoS<sub>2</sub>/MABI composites powder:**

MABI was synthesized by dissolving MAI and BiI<sub>3</sub> in molar ratio of 3:2. Specifically, 1176.38 mg BiI<sub>3</sub> was dissolved in 5 ml of anhydrous DMSO at 80°C, then 476.88 mg MAI was slowly added into the solution with vigorous stirring. A saturated bright orange solution was formed used for further preparation. 165 mg of 3 variants of MoS<sub>2</sub> (≈ 10 wt.% with respect to

total MABI formed) were added separately into three different solutions. Under stirring condition, anhydrous toluene was added dropwise in the solution. Precipitate would start to appear. Addition of anhydrous toluene was continued till the complete precipitation appeared with constant stirring at 90°C for 3 hours. The reaction mixture was centrifuged with dry ethyl acetate and the precipitate was collected after 3 washes. The precipitate was dried in vacuum oven at 80°C for 12 hours and stored inside the glove box for further use.

### **Characterization**

Powder X-ray diffractogram was obtained from Rigaku Micromax-007HF diffractometer equipped with Cu K $\alpha$ 1 irradiation ( $\lambda = 1.54184 \text{ \AA}$ ) at scan rate of 5°/min. Morphology studies were conducted using ZEISS, SIGMA FESEM and microscope (TEM) (JEOL-JEM 2010 operated at 200 kV). X-ray photoelectron spectroscopy (XPS) measurement was executed using a PHI 5000 Versa Probe III automated photoelectron spectrometer (ULVAC-PHI, Japan) with an Al K $\alpha$  X-ray beam (1486.7 eV) at 20 kV, 84 W for the analysis of the chemical compositions. Solid state UV-vis spectra were recorded on a PerkinElmer Lambda-750 UV-vis-near-IR spectrometer equipped with an integrating sphere and BaSO<sub>4</sub> powders were used as a reflectance standard. Photoluminescence spectra were determined by a Horiba Scientific FluoroMax-4 spectrofluorometer spectrometer. Energy-dispersive X-ray (EDX) spectroscopy (Sigma 300, Zeiss) was used for surface elemental analysis. CH Instruments 760D were used for Electrochemical measurements.

### **Photocatalytic measurement**

The photocatalytic hydrogen evolution experiments were carried out in a glass vessel coupled with gas chromatograph (Agilent 7820A GC System). A typical process consists: (a) 50 mg of photocatalyst dispersed in 15 mL of MABI saturated HI solution under constant stirring at 25°C, (b) degassing the photocatalytic chamber for 30 min, (c) using online gas chromatography to confirm no H<sub>2</sub> was being generated in the reaction chamber in absence of

light irradiation and (d) turning on the light source to start the photocatalytic HI splitting reaction with continuous monitoring of the hydrogen generation by gas chromatograph.

### **Photoelectrochemical measurement**

The electrochemical impedance spectroscopy (EIS), transient photocurrent response curves were performed on the electrochemical workstation (CH Instruments Ins.) in a three-electrode configuration with the assembled photoelectrodes (photocatalysts coated on 1 cm<sup>2</sup> of carbon paper) as the working electrode, the Ag/AgCl as the reference electrode and the Pt wire as the counter electrode. The EIS experiments were performed in MABI saturated aqueous HI solution under scan rate of 10 mV s<sup>-1</sup>.

### **Visible light source for photocatalytic measurements**

The visible light source used here for the experiments is a 50 W with power density of 150 mW/cm<sup>2</sup> white LED bought from Ledvance Osram. The spectrum of this light source is 420 - 790 nm.

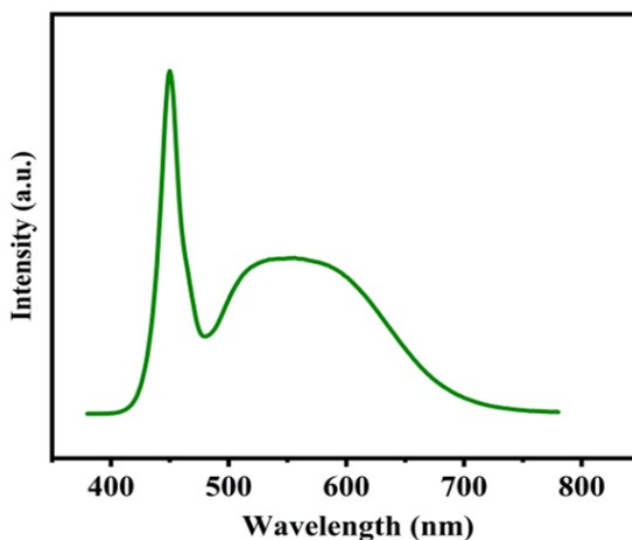

**Figure S1-** Electroluminescence of LED light source.

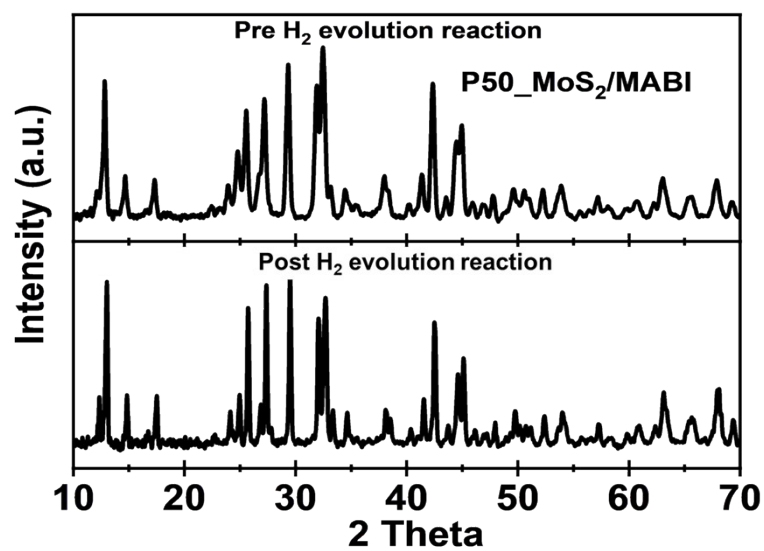

**Figure S2-** Stability study of P50\_MoS<sub>2</sub>/MABI composites through XRD.

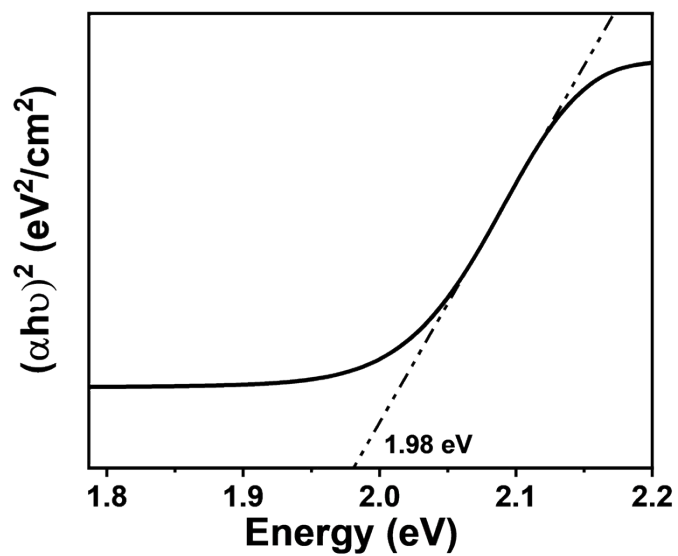

**Figure S3-** Band gap of MABI.

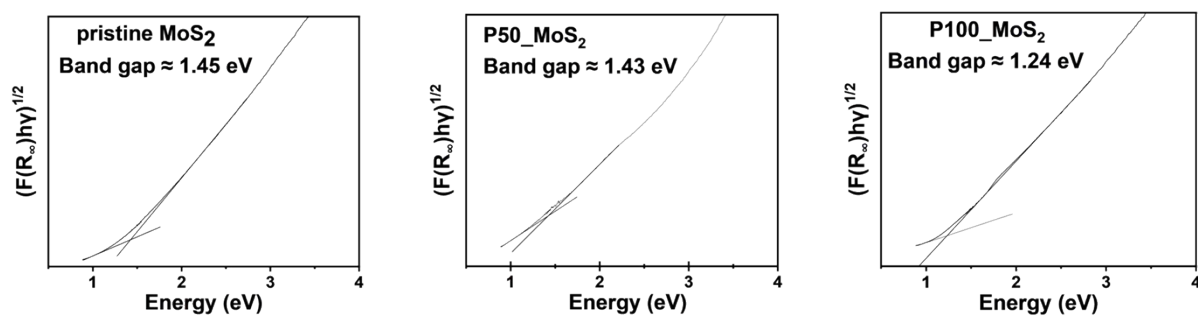

**Figure S4-** Band gap of 3 variants of MoS<sub>2</sub>.

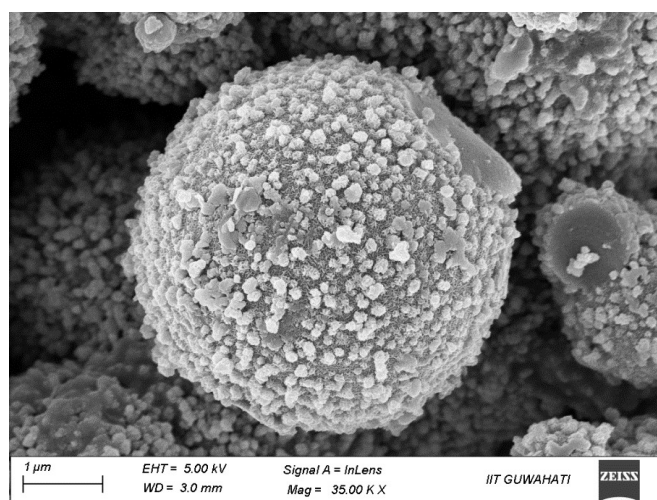

**Figure S5-** High resolution FESEM image of amorphous MoS<sub>2</sub>.

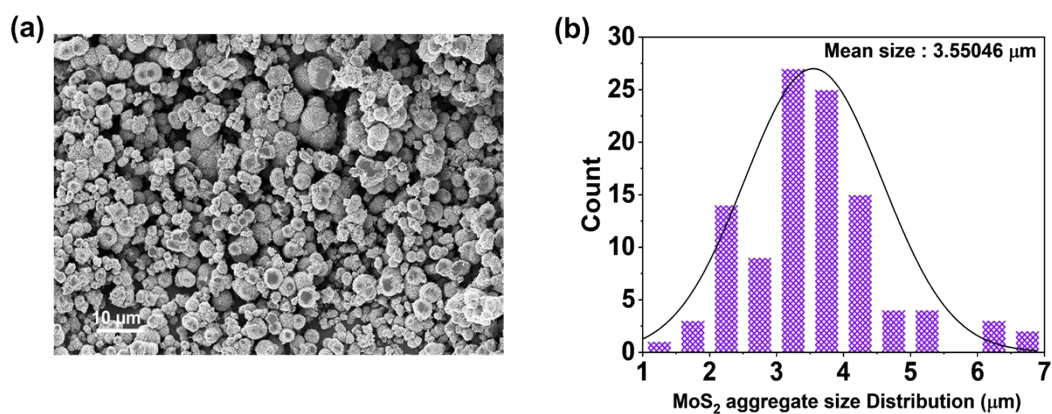

**Figure S6-** SEM images of synthesized amorphous MoS<sub>2</sub> aggregates (a) and (b) their size distributions.

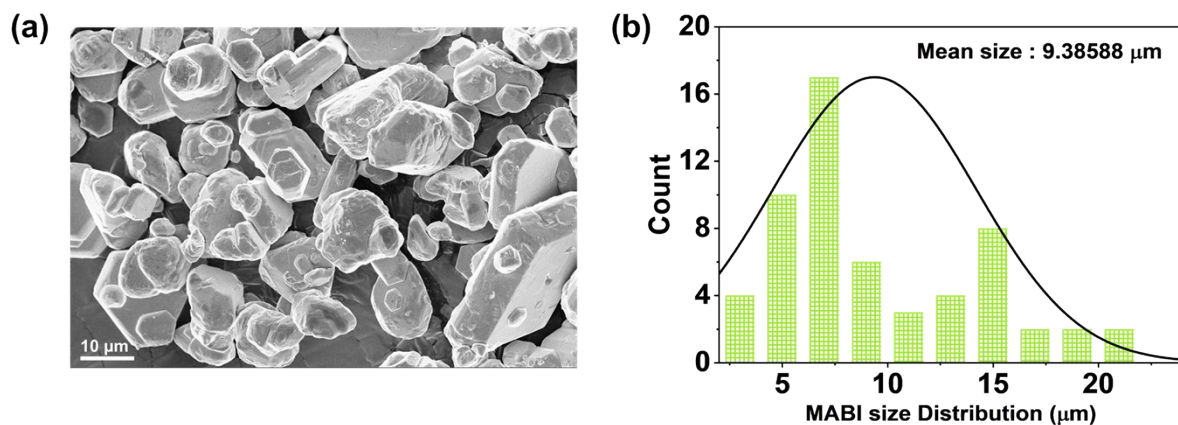

**Figure S7-** SEM images of synthesized MABI microcrystals (a) and (b) their size distributions.

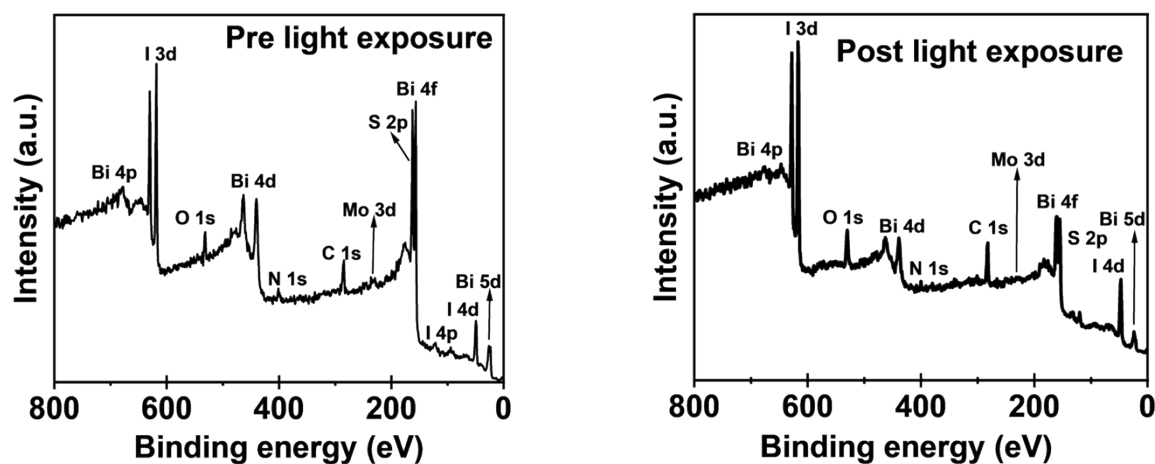

**Figure S8-** XPS of P50\_MoS<sub>2</sub>/MABI, post hydrogen evolution reaction.

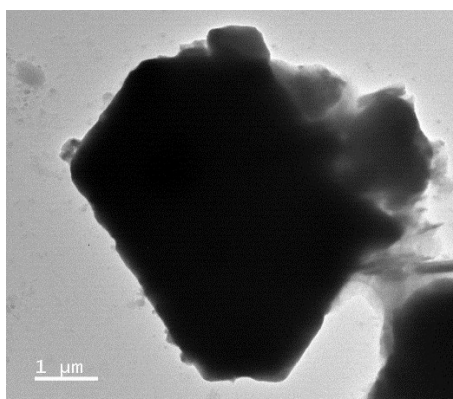

**Figure S9-** TEM image of P50\_MoS<sub>2</sub>/MABI, post hydrogen evolution reaction.

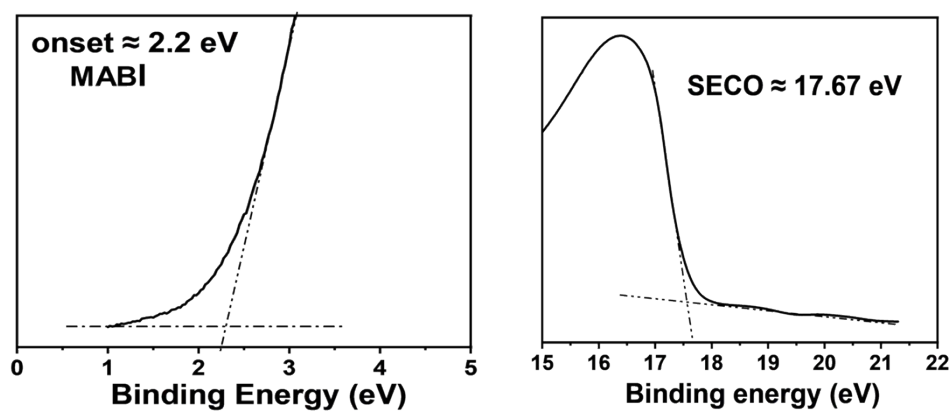

Figure S10- UPS analysis of MABI.

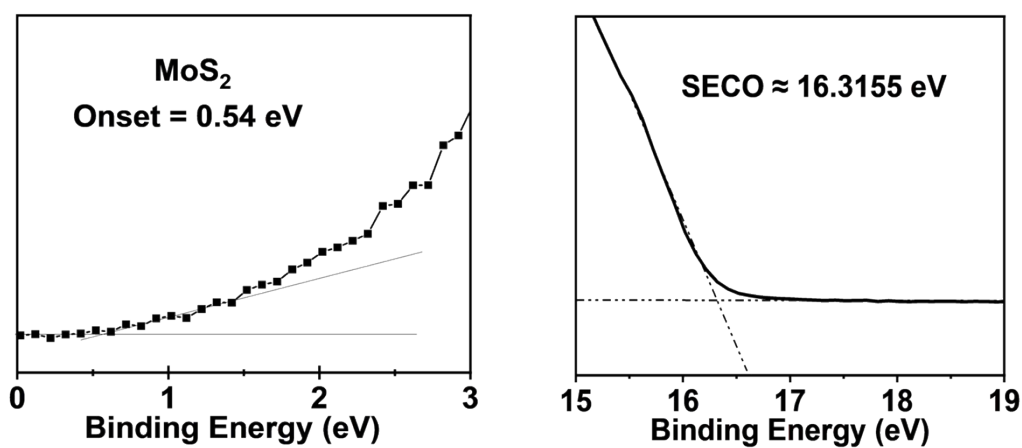

Figure S11- UPS analysis of  $\text{MoS}_2$ .

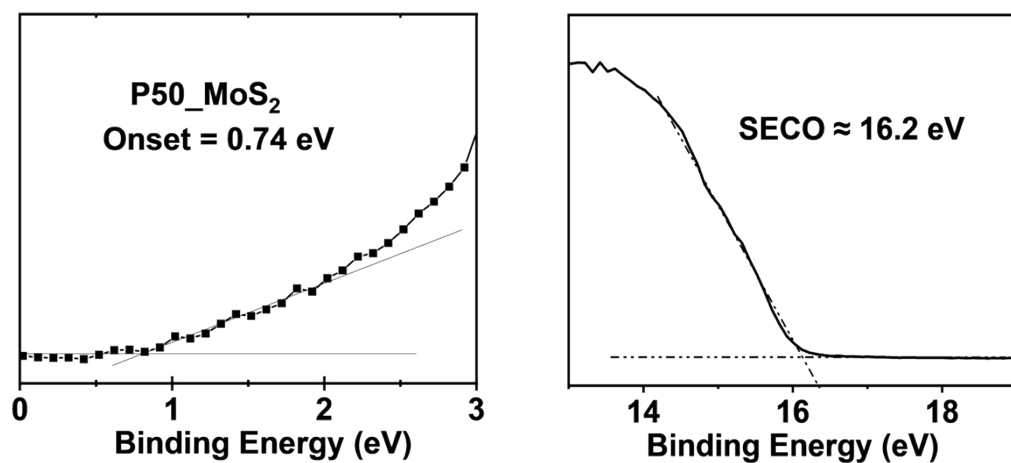

Figure S12- UPS analysis of  $\text{P50\_MoS}_2$ .



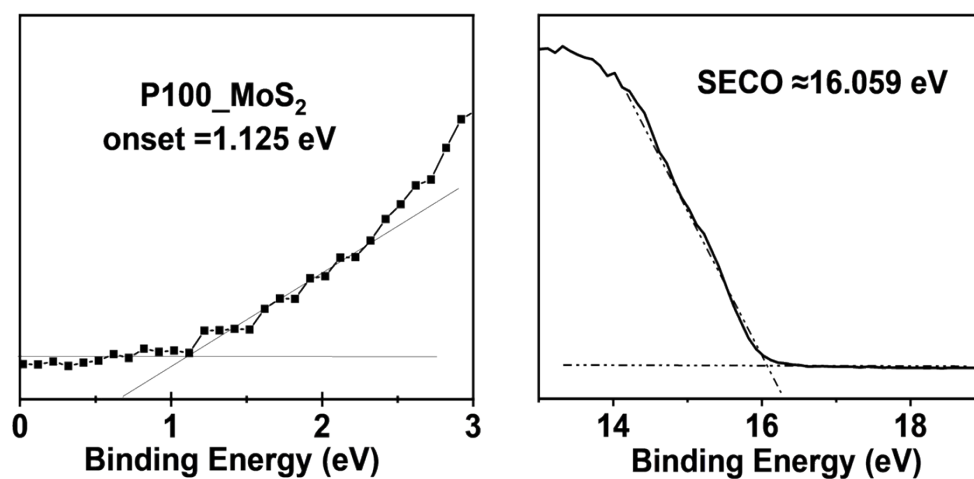

**Figure S13-** UPS analysis of P100\_MoS<sub>2</sub>.

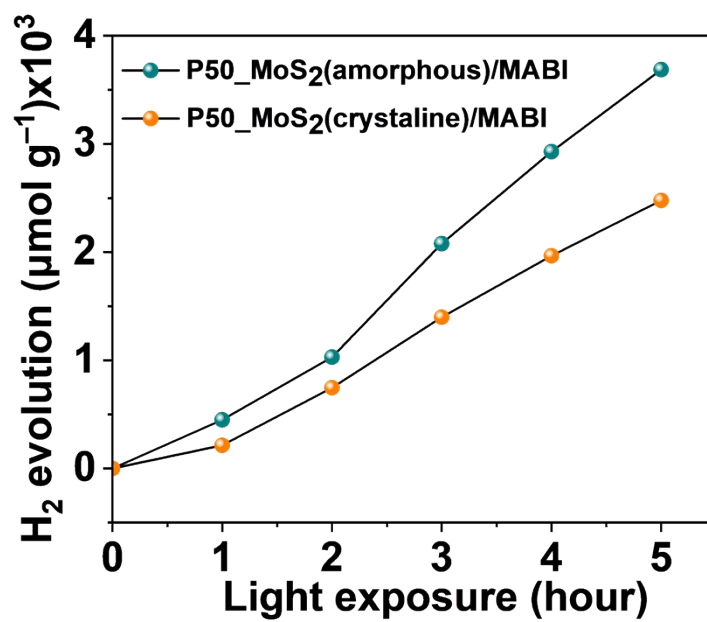

**Figure S14-** Comparison in HER activity between P50\_MoS<sub>2</sub>(amorphous)/MABI and P50\_MoS<sub>2</sub>(crystalline)/MABI.

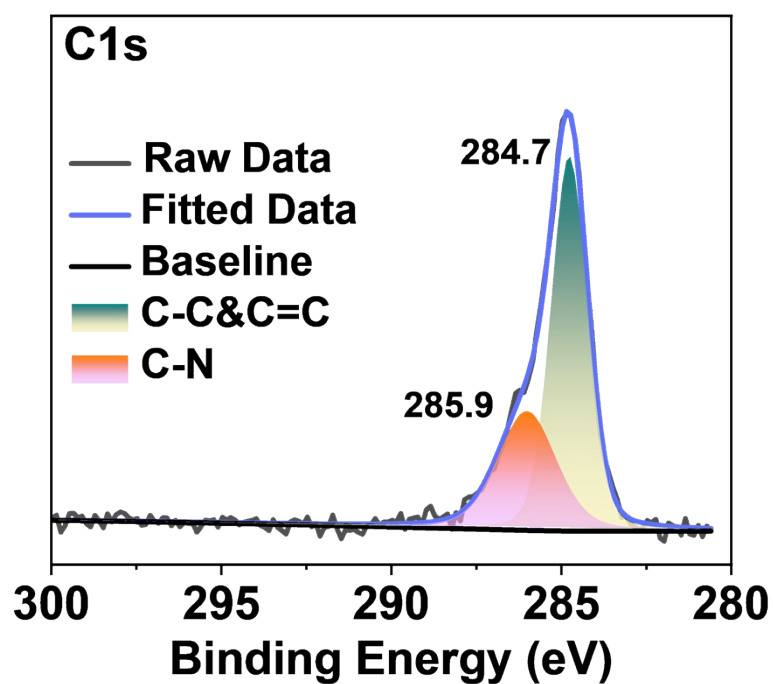

**Figure S15-** Deconvoluted C1s XPS spectra of MABI.

**Table S1.** Table for parameters of TRPL decays

|                                  | $A_1$   | $t_1$ (ns) | $A_2$   | $t_2$ (ns) | Average lifetime ( $T_{av}$ ) |
|----------------------------------|---------|------------|---------|------------|-------------------------------|
| <b>MABI</b>                      | 0.49569 | 0.86823    | 0.40312 | 9.05049    | 8.187 ns                      |
| <b>P500_MoS<sub>2</sub>/MABI</b> | 0.5647  | 0.83559    | 0.432   | 4.45275    | 4.2 ns                        |
| <b>P100_MoS<sub>2</sub>/MABI</b> | 0.5647  | 0.8355     | 0.432   | 4.45275    | 3.740 ns                      |
| <b>MoS<sub>2</sub>/MABI</b>      | 0.93866 | 0.74021    | 0.20732 | 4.53447    | 2.921 ns                      |

**Table S2.** performance and experimental parameters of reported halide perovskite photocatalysts for H<sub>2</sub> evolution.

| Material                                                             | Light source                                                | H <sub>2</sub> production (μmol g <sup>-1</sup> h <sup>-1</sup> ) | References |
|----------------------------------------------------------------------|-------------------------------------------------------------|-------------------------------------------------------------------|------------|
| MA <sub>3</sub> Bi <sub>2</sub> I <sub>9</sub>                       | 300 W Xe-lamp with a 400 nm cutoff filter                   | 12.9                                                              | 1          |
| MA <sub>3</sub> Bi <sub>2</sub> I <sub>9</sub> /Pt                   | 300 W Xe-lamp with a 400 nm cutoff filter                   | 169.21                                                            | 1          |
| P50_MoS <sub>2</sub> /MA <sub>3</sub> Bi <sub>2</sub> I <sub>9</sub> | 50 W white LED with power density of 150 mW/cm <sup>2</sup> | 1176                                                              | This work  |

#### Reference-

- (1) Guo, Y.; Liu, G.; Li, Z.; Lou, Y.; Chen, J.; Zhao, Y. Stable Lead-Free (CH<sub>3</sub>NH<sub>3</sub>)<sub>3</sub>Bi<sub>2</sub>I<sub>9</sub> Perovskite for Photocatalytic Hydrogen Generation. *ACS Sustain. Chem. Eng.* **2019**, 7, 15080–15085.
